# Supplementary material for: Telomere status in chronic lymphocytic leukemia with TP53 disruption
Source: PubMed Central journal article supplement (PMC5302966; doi:10.18632/oncotarget.10927), 2016-07-29
Supplement: oncotarget-07-56976-s001.pdf [file oncotarget-07-56976-s001.pdf]

## Telomere status in chronic lymphocytic leukemia with *TP53* disruption

### SUPPLEMENTARY FIGURES AND TABLES

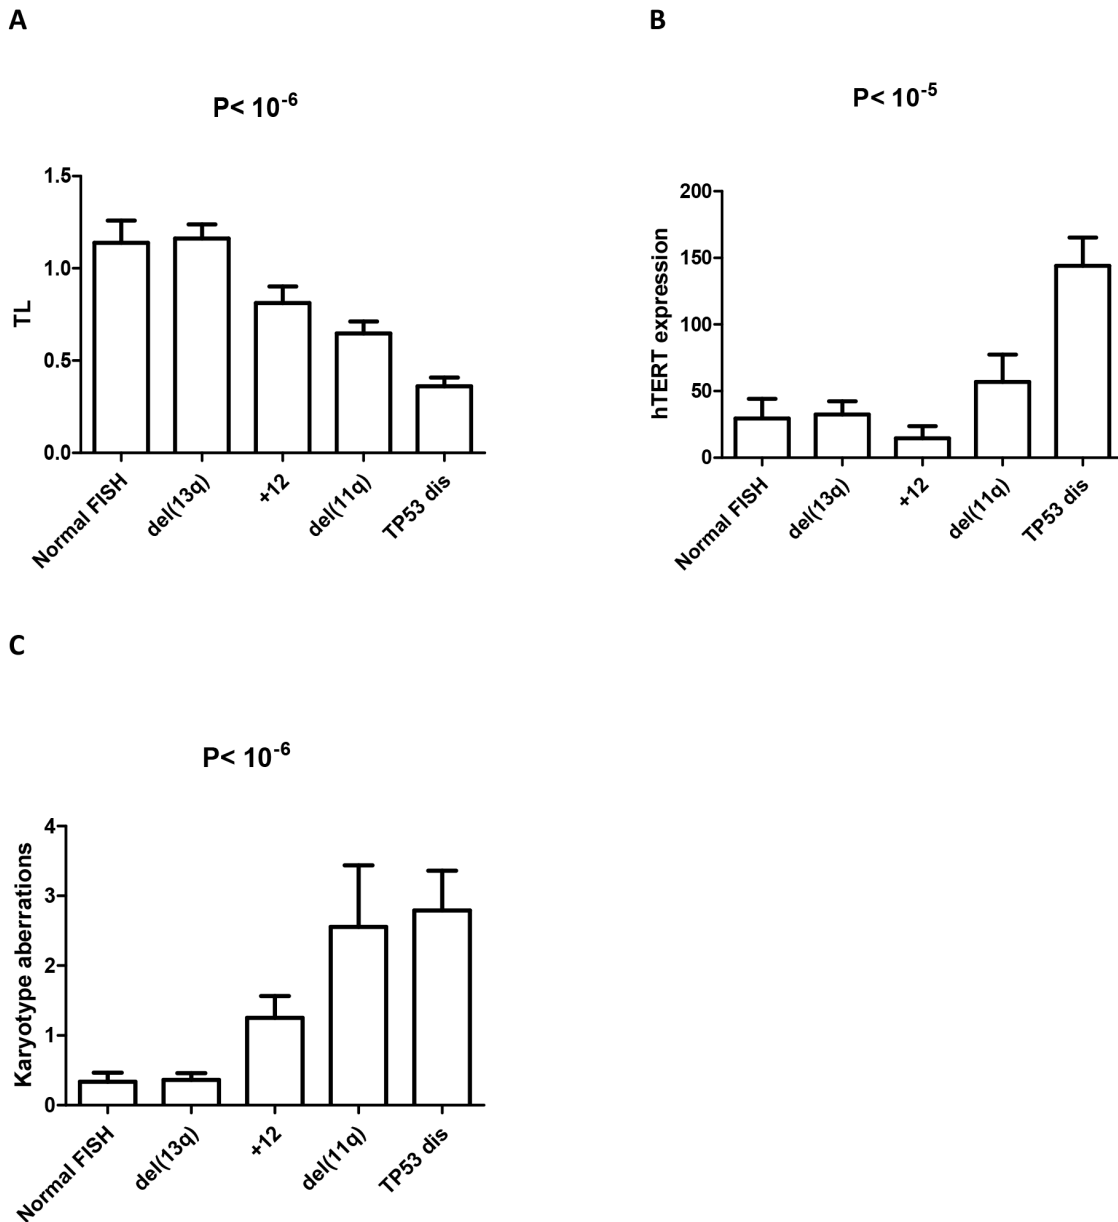

**Supplementary Figure S1: *TP53*-disrupted patients showed the shortest telomeres A. the highest *hTERT* expression B. and the highest mean number of karyotype aberrations among CLL subgroups C. The comparisons were made using the Kruskal-Wallis H test.**

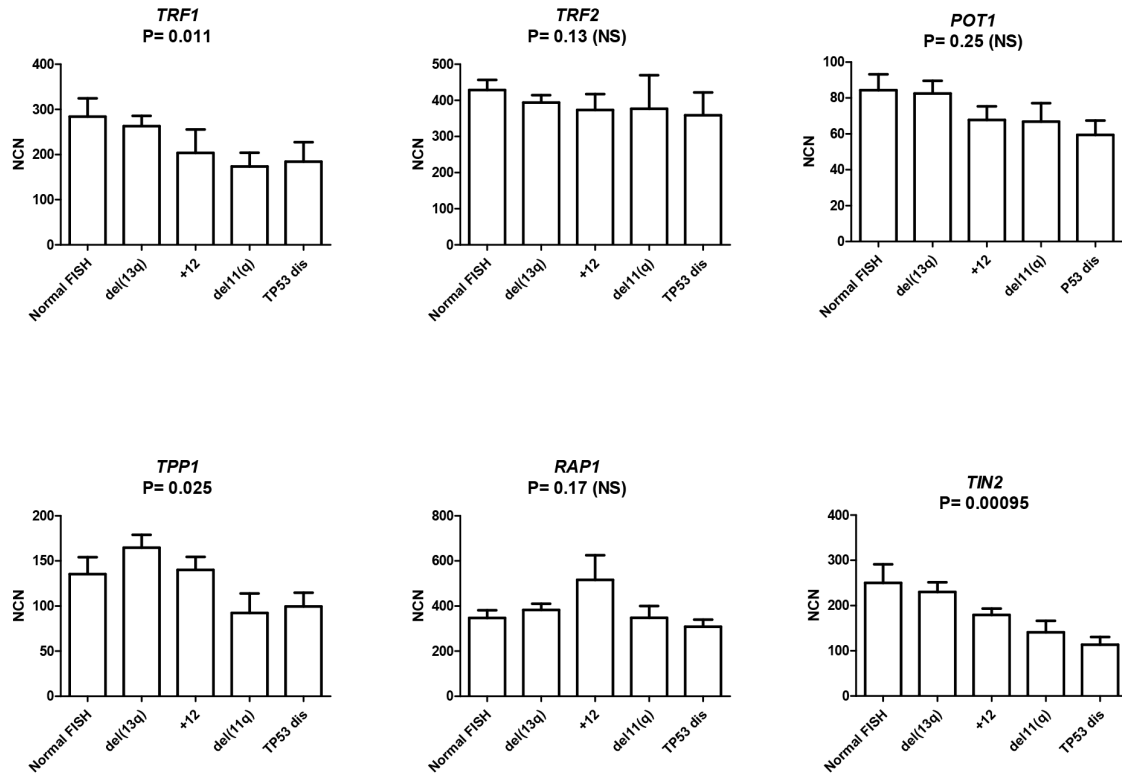

Supplementary Figure S2: *TP53*-disrupted showed the lowest levels of shelterin gene expression, which was significant for *TRF1* and *TPP1* and highly significant for *TIN2* (H test). NCN= normalized copy-number of mRNA.

Supplementary Table S1: Patients' characteristics

|                            | Median [range]<br>or No. (%) |
|----------------------------|------------------------------|
| Total number of patients   | 115                          |
| Median age, years [range]  | 69 [39-90]                   |
| Gender: Male/Female        | 77/38                        |
| Binet stages, <i>n</i> (%) |                              |
| A                          | 56 (49)                      |
| B                          | 24 (21)                      |
| C                          | 35 (30)                      |
| Lymphocyte doubling time   |                              |
| <6 months                  | 49 (43)                      |
| ≥6 months                  | 66 (57)                      |
| CD38 expression            |                              |
| negative (<7%)             | 87 (76)                      |
| positive (≥7%)             | 28 (24)                      |
| Cytogenetics               |                              |
| del(17p)                   | 14 (12)                      |
| del(11q)                   | 15 (13)                      |
| trisomy 12                 | 10 (9)                       |
| normal karyotype           | 18 (16)                      |
| del(13q) only abnormality  | 50 (43)                      |
| various abnormalities      | 8 (7)                        |
| complex karyotype          | 13 (11)                      |
| <i>IGHV</i> status         |                              |
| mutated                    | 65 (56)                      |
| unmutated                  | 48 (42)                      |
| not determined             | 2 (2)                        |

**Supplementary Table S2: Characteristics of *TP53* mutations found in this CLL series and including the data from previously reported cancer cases from the IARC TP53 Database (<http://www-p53.iarc.fr/>)**

| Patient | Mutation (estimated % of mutated clone) | Position | Amino-acid change | Type of mutation                             | Impact      | Cases reported by IARC (most common sites) |
|---------|-----------------------------------------|----------|-------------------|----------------------------------------------|-------------|--------------------------------------------|
| CLL #1  | c.529_546del18 (50%)                    | Exon 5   | p.177_182del      | deletion of 6 amino acids without frameshift | (no data)   | 13 (anus, testicle)                        |
| CLL #2  | c.701A>G (30%)                          | Exon 7   | p.Y234C           | missense                                     | deleterious | 144 (tonsil)                               |
| CLL #3  | c.814G>T (70%)                          | Exon 7   | p.V272L           | missense                                     | deleterious | 42 (gingiva, tongue)                       |
| CLL #4  | c.814G>T (50%)                          | Exon 8   | p.V272L           | missense                                     | deleterious | 42 (gingiva, tongue)                       |
| CLL #5  | c.840 A>T (60%)                         | Exon 8   | p.R280S           | missense                                     | deleterious | 23 (hypopharynx, urinary tract)            |
| CLL #6  | c.536A>G (10%)                          | Exon 5   | p.H179R           | missense                                     | deleterious | 171 (ureter and recto-sigmoidal junction)  |
| CLL #7  | c.743G>A (50%)                          | Exon 7   | p.R248Q           | missense                                     | deleterious | 939 (female genital tract)                 |
| CLL #8  | c.476C>T (50%)                          | Exon 5   | p.A159V           | missense                                     | deleterious | 55 (uterus, respiratory system)            |
| CLL #9  | c.542G>C (30%)                          | Exon 5   | p.R181P           | missense                                     | deleterious | 24 (sinus, bone)                           |
| CLL #10 | c.523C>G (50%)                          | Exon 5   | p.R175G           | missense                                     | deleterious | 24 (hematopoietic tissue, lung)            |
| CLL #11 | c.818G>A (50%)                          | Exon 8   | p.R273H           | missense                                     | deleterious | 851 (endocrine, penis)                     |
| CLL #12 | c.701A>G (30%)                          | Exon 7   | p.Y234C           | missense                                     | deleterious | 144 (tonsil)                               |
| CLL #13 | c.733G>T (50%)                          | Exon 7   | p.G245C           | missense                                     | deleterious | 91 (peritoneum)                            |
| CLL #14 | c.467G>C (100%)                         | Exon 5   | p.R156P           | missense                                     | deleterious | 45 (bone)                                  |
| CLL #15 | c.524G>A (20%)                          | Exon 5   | p.R175H           | missense                                     | deleterious | 1211 (urinary tract, head & neck)          |
|         | c.763A>T (20%)                          | Exon 7   | p.I255F           | missense                                     | deleterious | 42 (palate, peritoneum)                    |
| CLL #16 | c.625_626del2 (70%)                     | Exon 6   | p.R209Kfs6        | frameshift                                   | (no data)   | 44 (salivary glands)                       |
| CLL #17 | c.618_634del (100%)                     | Exon 6   | p.L206Ffs2X       | frameshift                                   | unknown     | unknown                                    |
| CLL #18 | c.493C>T (60%)                          | Exon 5   | p.Q165X           | nonsense                                     | deleterious | 48 (nasal??, bladder)                      |
|         | c.1025_1060del (40%)                    | Exon 10  | p.R342Qfs39X      | frameshift                                   | unknown     | unknown                                    |
| CLL #19 | c.584T>C (30%)                          | Exon 6   | p.I195T           | missense                                     | deleterious | 106 (uterus, palate)                       |
|         | c.673-2A>C (15%)                        | Intron 7 | -                 | splice site                                  | (no data)   | 4 (hematopoietic tissue)                   |
|         | c.842A>T (25%)                          | Exon 8   | p.D281V           | missense                                     | deleterious | 5 (bone, lymph node)                       |
| CLL #20 | c.993+1G>A (80%)                        | Intron 9 | -                 | splice site                                  | (no data)   | 17 (pancreas, ovary)                       |
